# Supplementary material
Source: Springer Nature journal article supplement (https://www.springermedizin.de/resource/supplementary/12936_2008_718_MOESM5_ESM.pdf/9548084)

## DONOR 1

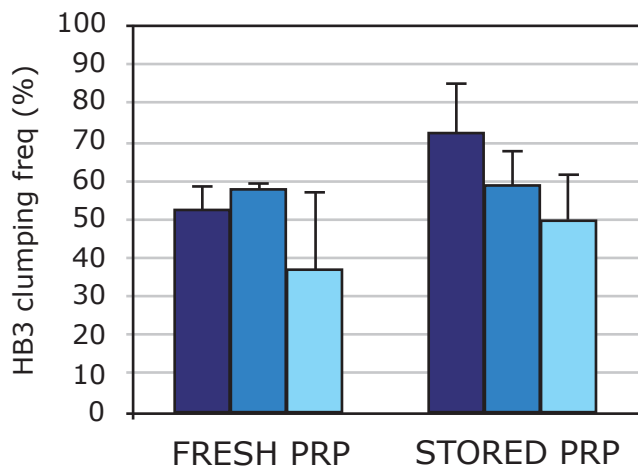

## DONOR 2

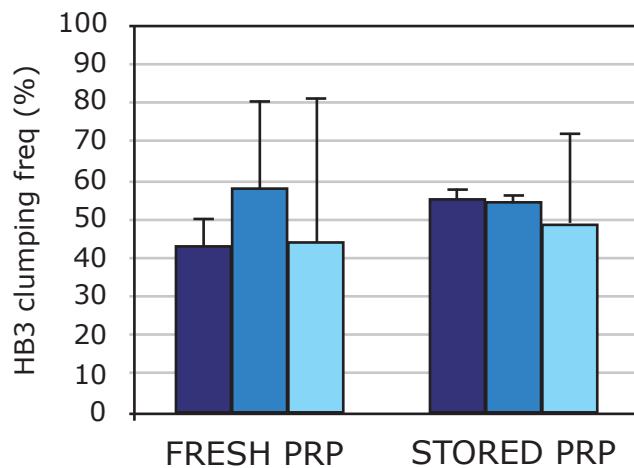

## DONOR 3

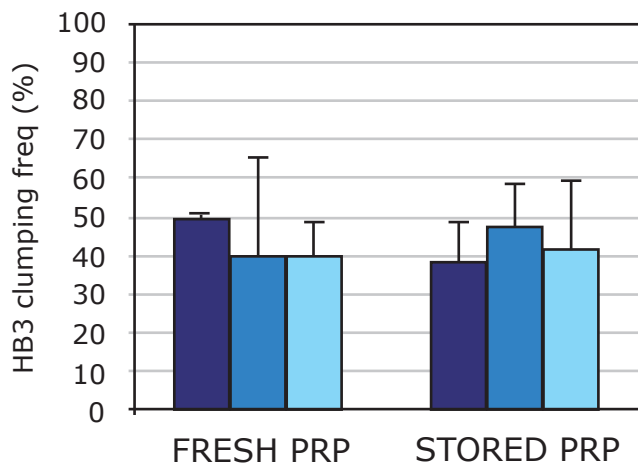

## DONOR 4

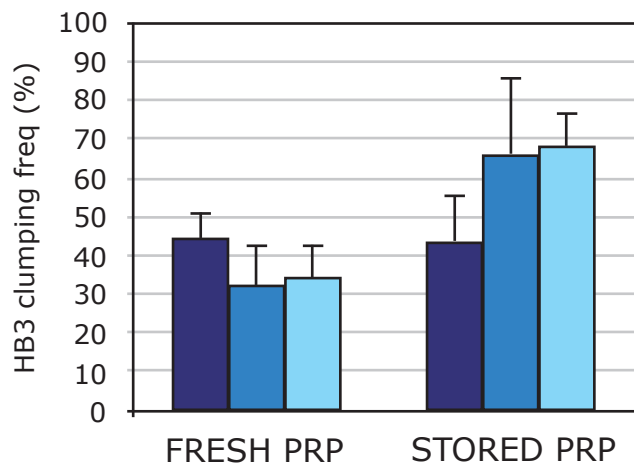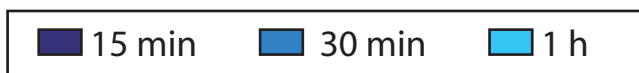

Supplement: MOESM5 [file 9548084]
